# Supplementary material for: Effects of Core and/or Peripheral Protonation ofmeso-Tetra(2-, 3-, and 4-pyridyl)Porphyrin andmeso-Tetra(3-methylpyridyl)Porphyrin on Their UV-vis Spectra
Source: Hindawi journal article supplement (doi:10.1155/2013/713745), 2012-10-16
Supplement: f1 [file 713745.f1.pdf]

Table S1. UV-vis spectral data for the interaction of H<sub>2</sub>t(py)P with H<sub>2</sub>C<sub>2</sub>O<sub>4</sub> in CH<sub>2</sub>Cl<sub>2</sub>.

| Porphyrins and the dications                                                        | Soret band<br>( $\lambda$ /nm) | Q(0,0) band<br>( $\lambda$ /nm) |
|-------------------------------------------------------------------------------------|--------------------------------|---------------------------------|
| H <sub>2</sub> t(2-py)P                                                             | 417.0                          | 642.2                           |
| H <sub>2</sub> t(2-py)P(H <sub>2</sub> C <sub>2</sub> O <sub>4</sub> ) <sub>2</sub> | 449.8                          | 645.2                           |
| $\Delta\nu$ (cm <sup>-1</sup> )                                                     | -1748.7                        | -77.3                           |
| H <sub>2</sub> t(3-py)P                                                             | 418.0                          | 646.4                           |
| H <sub>2</sub> t(3-py)P(H <sub>2</sub> C <sub>2</sub> O <sub>4</sub> ) <sub>2</sub> | 439.7                          | 636.2                           |
| $\Delta\nu$ (cm <sup>-1</sup> )                                                     | -1180.6                        | 248.0                           |
| H <sub>2</sub> t(4-py)P                                                             | 416.0                          | 643.0                           |
| H <sub>2</sub> t(4-py)P(H <sub>2</sub> C <sub>2</sub> O <sub>4</sub> ) <sub>2</sub> | 443.1                          | 654.3                           |
| $\Delta\nu$ (cm <sup>-1</sup> )                                                     | -470.2                         | -268.5                          |

Table S2. UV-vis spectral data for the interaction of H<sub>2</sub>t(py)P with HNO<sub>3</sub> in CH<sub>2</sub>Cl<sub>2</sub>.

| Porphyrins and the dications                            | Soret band<br>( $\lambda$ /nm) | Q(0,0) band<br>( $\lambda$ /nm) |
|---------------------------------------------------------|--------------------------------|---------------------------------|
| H <sub>2</sub> t(2-py)P                                 | 417.0                          | 642.0                           |
| H <sub>2</sub> t(2-py)P(HNO <sub>3</sub> ) <sub>2</sub> | 449.8                          | 650.9                           |
| $\Delta\nu$ (cm <sup>-1</sup> )                         | -1748.7                        | -213.0                          |
| H <sub>2</sub> t(3-py)P                                 | 418.0                          | 646.4                           |
| H <sub>2</sub> t(3-py)P(HNO <sub>3</sub> ) <sub>2</sub> | 441.9                          | 639.6                           |
| $\Delta\nu$ (cm <sup>-1</sup> )                         | -1293.8                        | 164.5                           |
| H <sub>2</sub> t(4-py)P                                 | 416.0                          | 643.0                           |
| H <sub>2</sub> t(4-py)P(HNO <sub>3</sub> ) <sub>2</sub> | 453.2                          | 647.5                           |
| $\Delta\nu$ (cm <sup>-1</sup> )                         | -1973.1                        | -107.9                          |

Table S3. UV-vis spectral data for the interaction of H<sub>2</sub>t(py)P with H<sub>2</sub>SO<sub>4</sub> in CH<sub>2</sub>Cl<sub>2</sub>.

| Porphyrins and the dications                                          | Soret band ( $\lambda$ /nm) | Q(0,0) band ( $\lambda$ /nm) |
|-----------------------------------------------------------------------|-----------------------------|------------------------------|
| H <sub>2</sub> t(2-py)P                                               | 417.0                       | 642.0                        |
| H <sub>2</sub> t(2-py)P(H <sub>2</sub> SO <sub>4</sub> ) <sub>2</sub> | 447.6                       | 641.8                        |
| $\Delta\nu$ (cm <sup>-1</sup> )                                       | -1639.5                     | 4.8                          |
| H <sub>2</sub> t(3-py)P                                               | 418.0                       | 646.4                        |
| H <sub>2</sub> t(3-py)P(H <sub>2</sub> SO <sub>4</sub> ) <sub>2</sub> | 436.3                       | 633.9                        |
| $\Delta\nu$ (cm <sup>-1</sup> )                                       | -1019.0                     | 305.0                        |
| H <sub>2</sub> t(4-py)P                                               | 416.0                       | 643.0                        |
| H <sub>2</sub> t(4-py)P(H <sub>2</sub> SO <sub>4</sub> ) <sub>2</sub> | 446.4                       | 640.7                        |
| $\Delta\nu$ (cm <sup>-1</sup> )                                       | -1637.0                     | 55.9                         |
