# Supplementary material for: Effects of Core and/or Peripheral Protonation ofmeso-Tetra(2-, 3-, and 4-pyridyl)Porphyrin andmeso-Tetra(3-methylpyridyl)Porphyrin on Their UV-vis Spectra
Source: Hindawi journal article supplement (doi:10.1155/2013/713745), 2012-10-16
Supplement: f2 [file 713745.f2.pdf]

Table S1. UV-vis spectral data for the interaction of H<sub>2</sub>t(py)P with H<sub>2</sub>C<sub>2</sub>O<sub>4</sub> in CH<sub>2</sub>Cl<sub>2</sub>.

| Porphyrins and the dications                                            | Soret band       | Q(0,0) band      |
|-------------------------------------------------------------------------|------------------|------------------|
|                                                                         | ( $\lambda$ /nm) | ( $\lambda$ /nm) |
| H <sub>2</sub> t(2-py)P                                                 | 417.0            | 642.2            |
| [H <sub>4</sub> t(2-py)P](HC <sub>2</sub> O <sub>4</sub> ) <sub>2</sub> | 449.8            | 645.2            |
| $\Delta\nu$ (cm <sup>-1</sup> )                                         | -1748.7          | -77.3            |
| H <sub>2</sub> t(3-py)P                                                 | 418.0            | 646.4            |
| [H <sub>4</sub> t(3-py)P](HC <sub>2</sub> O <sub>4</sub> ) <sub>2</sub> | 439.7            | 636.2            |
| $\Delta\nu$ (cm <sup>-1</sup> )                                         | -1180.6          | 248.0            |
| H <sub>2</sub> t(4-py)P                                                 | 416.0            | 643.0            |
| [H <sub>4</sub> t(4-py)P](HC <sub>2</sub> O <sub>4</sub> ) <sub>2</sub> | 443.1            | 654.3            |
| $\Delta\nu$ (cm <sup>-1</sup> )                                         | -470.2           | -268.5           |

Table S2. UV-vis spectral data for the interaction of H<sub>2</sub>t(py)P with HNO<sub>3</sub> in CH<sub>2</sub>Cl<sub>2</sub>.

| Porphyrins and the dications                             | Soret band<br>( $\lambda$ /nm) | Q(0,0) band<br>( $\lambda$ /nm) |
|----------------------------------------------------------|--------------------------------|---------------------------------|
| H <sub>2</sub> t(2-py)P                                  | 417.0                          | 642.0                           |
| [H <sub>4</sub> t(2-py)P](NO <sub>3</sub> ) <sub>2</sub> | 449.8                          | 650.9                           |
| $\Delta\nu$ (cm <sup>-1</sup> )                          | -1748.7                        | -213.0                          |
| H <sub>2</sub> t(3-py)P                                  | 418.0                          | 646.4                           |
| [H <sub>4</sub> t(3-py)P](NO <sub>3</sub> ) <sub>2</sub> | 441.9                          | 639.6                           |
| $\Delta\nu$ (cm <sup>-1</sup> )                          | -1293.8                        | 164.5                           |
| H <sub>2</sub> t(4-py)P                                  | 416.0                          | 643.0                           |
| [H <sub>4</sub> t(4-py)P](NO <sub>3</sub> ) <sub>2</sub> | 453.2                          | 647.5                           |
| $\Delta\nu$ (cm <sup>-1</sup> )                          | -1973.1                        | -107.9                          |

Table S3. UV-vis spectral data for the interaction of H<sub>2</sub>t(py)P with H<sub>2</sub>SO<sub>4</sub> in CH<sub>2</sub>Cl<sub>2</sub>.

| Porphyrins and the dications                              | Soret band ( $\lambda$ /nm) | Q(0,0) band ( $\lambda$ /nm) |
|-----------------------------------------------------------|-----------------------------|------------------------------|
| H <sub>2</sub> t(2-py)P                                   | 417.0                       | 642.0                        |
| [H <sub>4</sub> t(2-py)P](HSO <sub>4</sub> ) <sub>2</sub> | 447.6                       | 641.8                        |
| $\Delta\nu$ (cm <sup>-1</sup> )                           | -1639.5                     | 4.8                          |
| H <sub>2</sub> t(3-py)P                                   | 418.0                       | 646.4                        |
| [H <sub>4</sub> t(3-py)P](HSO <sub>4</sub> ) <sub>2</sub> | 436.3                       | 633.9                        |
| $\Delta\nu$ (cm <sup>-1</sup> )                           | -1019.0                     | 305.0                        |
| H <sub>2</sub> t(4-py)P                                   | 416.0                       | 643.0                        |
| [H <sub>4</sub> t(4-py)P](HSO <sub>4</sub> ) <sub>2</sub> | 446.4                       | 640.7                        |
| $\Delta\nu$ (cm <sup>-1</sup> )                           | -1637.0                     | 55.9                         |
